# Supplementary material for: The tropical route of QBO teleconnections in a climate model
Source: Copernicus journal article supplement (doi:10.5194/wcd-2022-14), 2022-03-07
Supplement: Supplementary file 1 [file wcd-2022-14-supplement.pdf]

## Supplement to The tropical route of QBO teleconnections in a climate model WCD

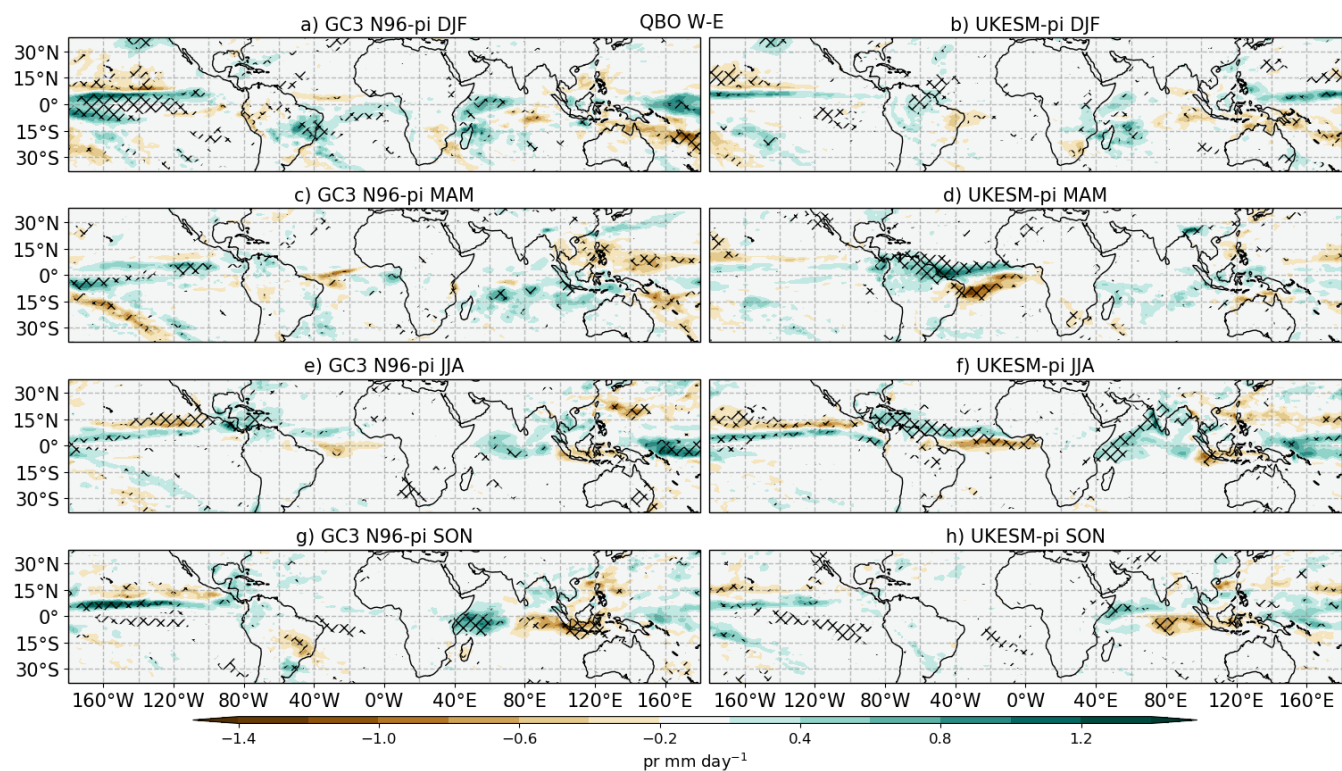

**Figure S1.** Seasonal mean precipitation differences between QBO W-E phases in (left) GC3 N96-pi and (right) UKESM-pi for (a, b) DJF, (c, d) MAM, (e, f) JJA and (g, h) SON. Hatching denotes statistically significant differences to the 95% confidence level using a bootstrapping with replacement test.

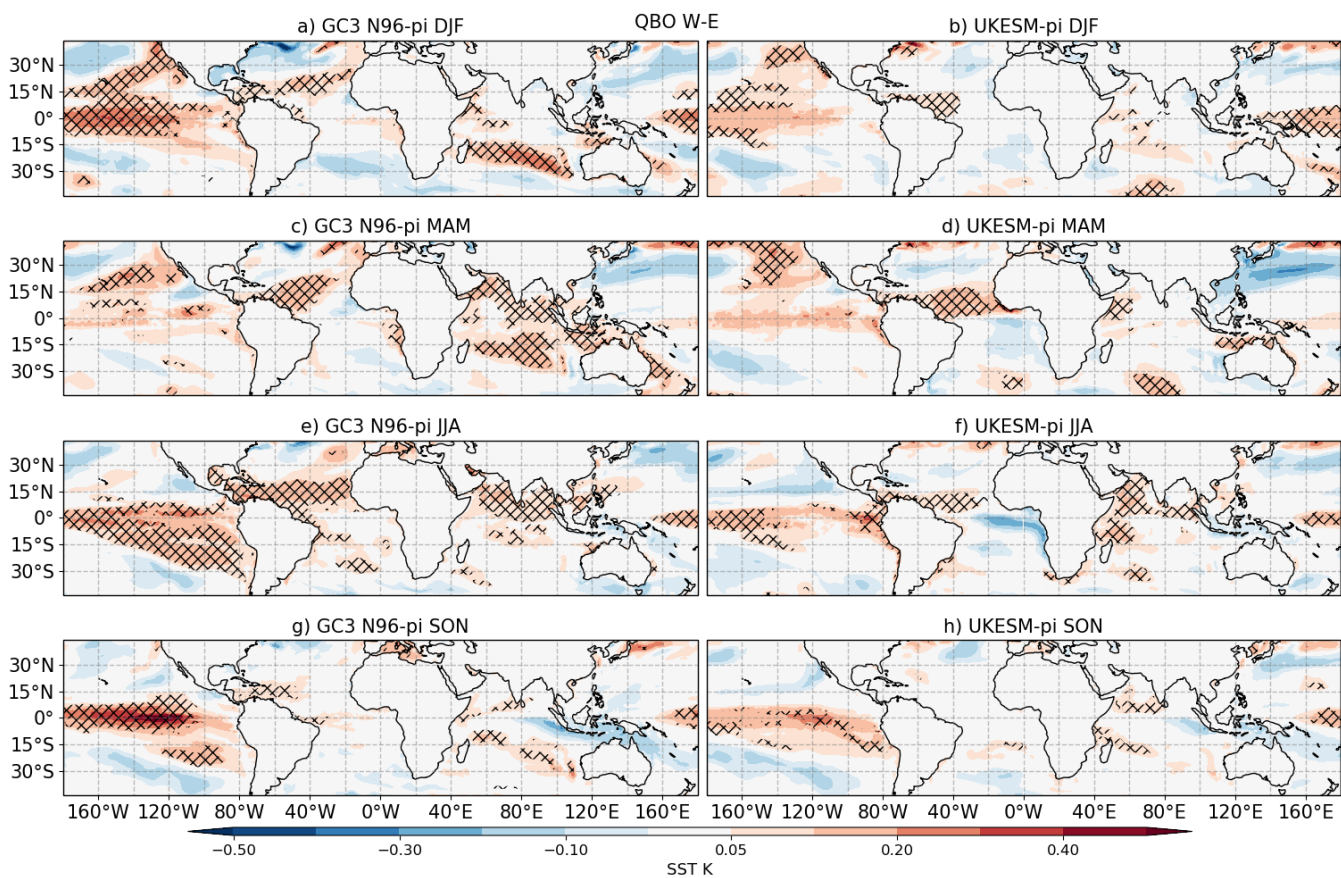

**Figure S2.** SST composite differences for (left) GC3 N96-pi and (right) UKESM-pi for the seasons of (a-b) DJF, (c-d) MAM, (e-f) JJA and (g-h) SON.

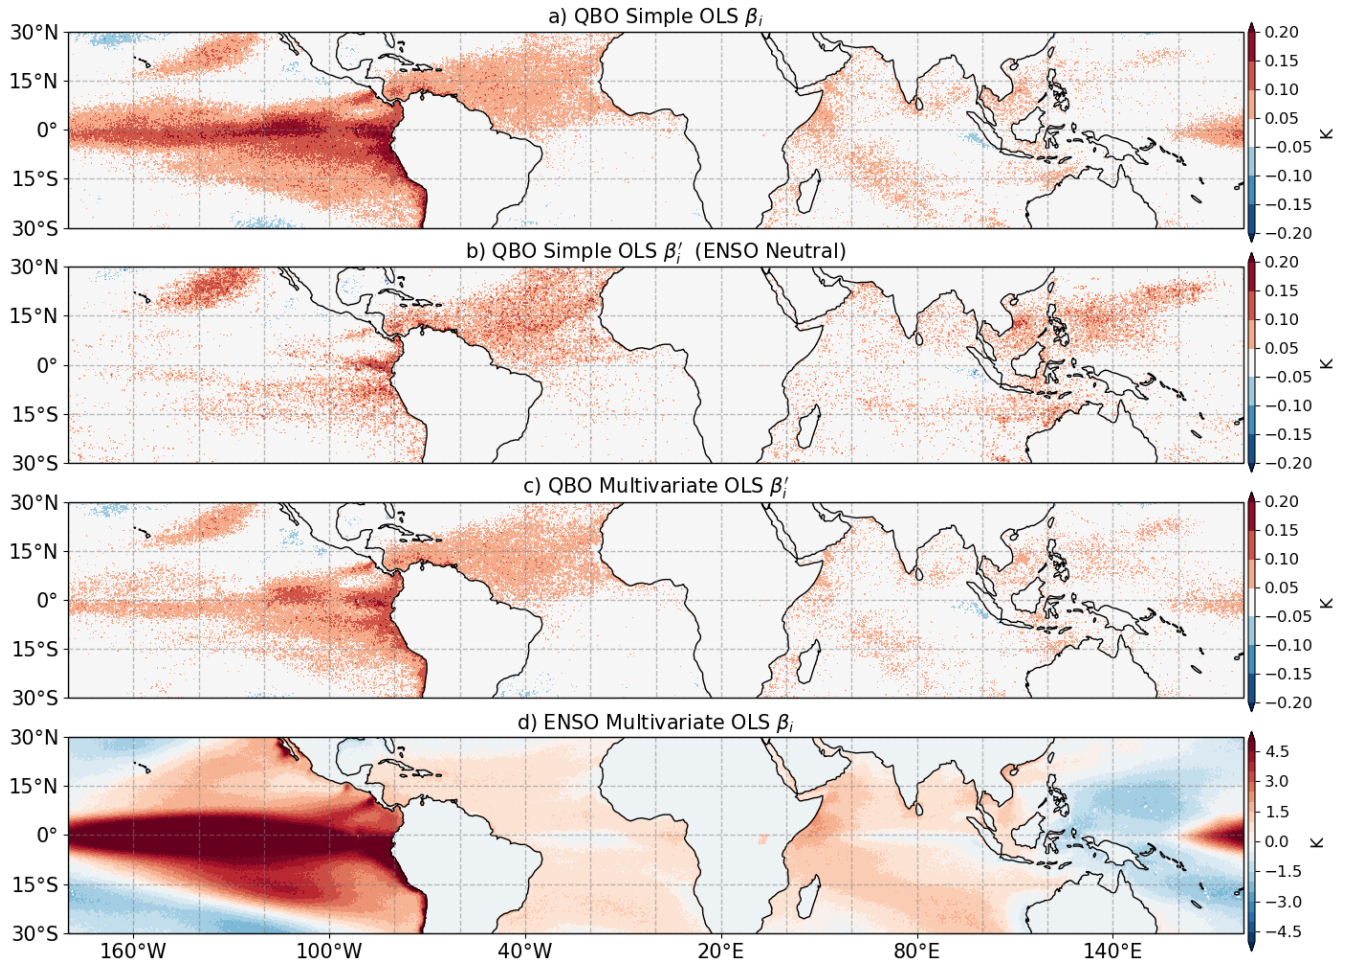

**Figure S3.** Regression analysis as in Figure 5 of the main manuscript but for sea-surface temperatures (SSTs).

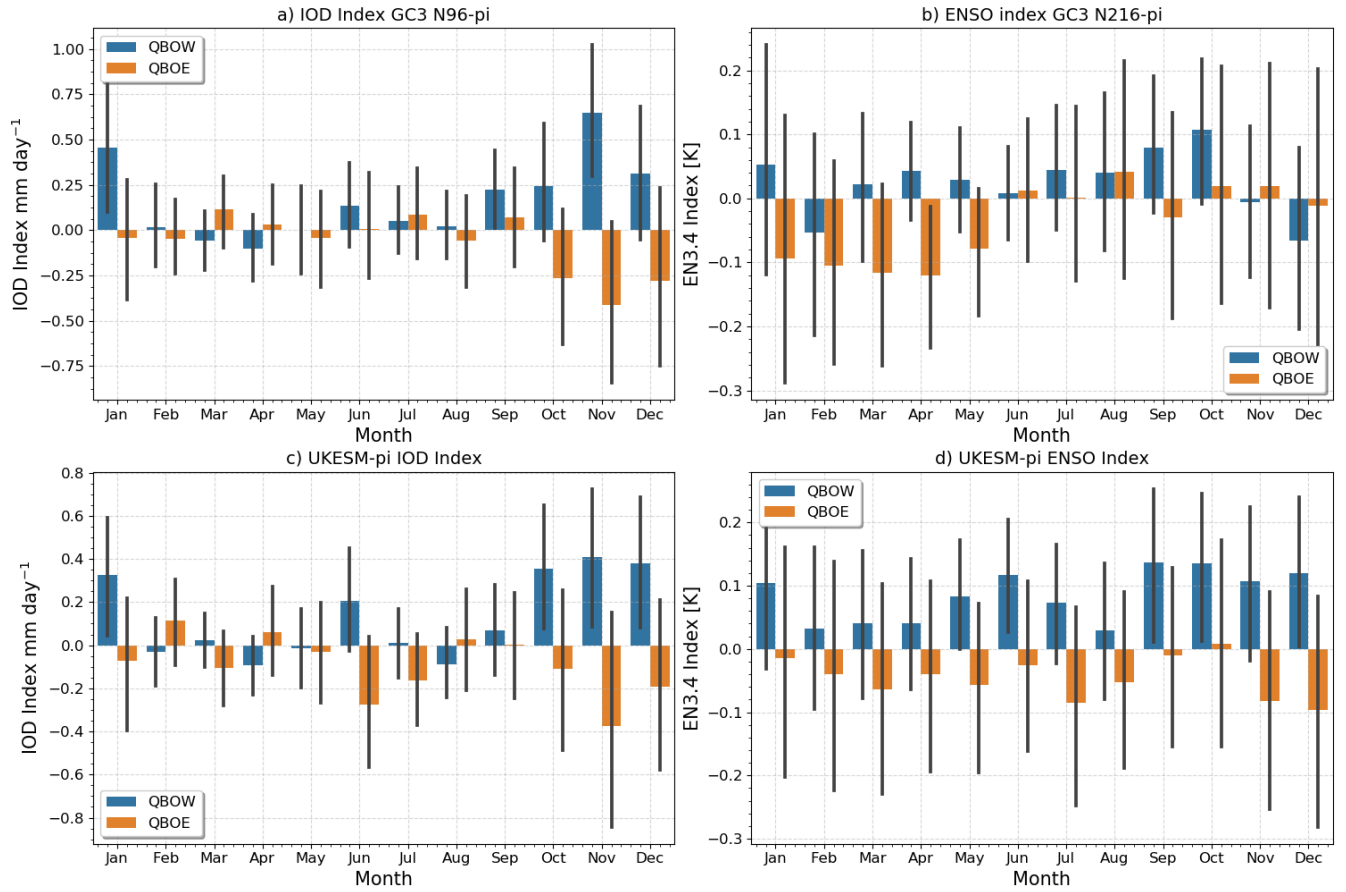

**Figure S4.** As in Figure 6 of the main manuscript but for (a, b) GC3 N96-pi and (c, d) UKESM-pi.

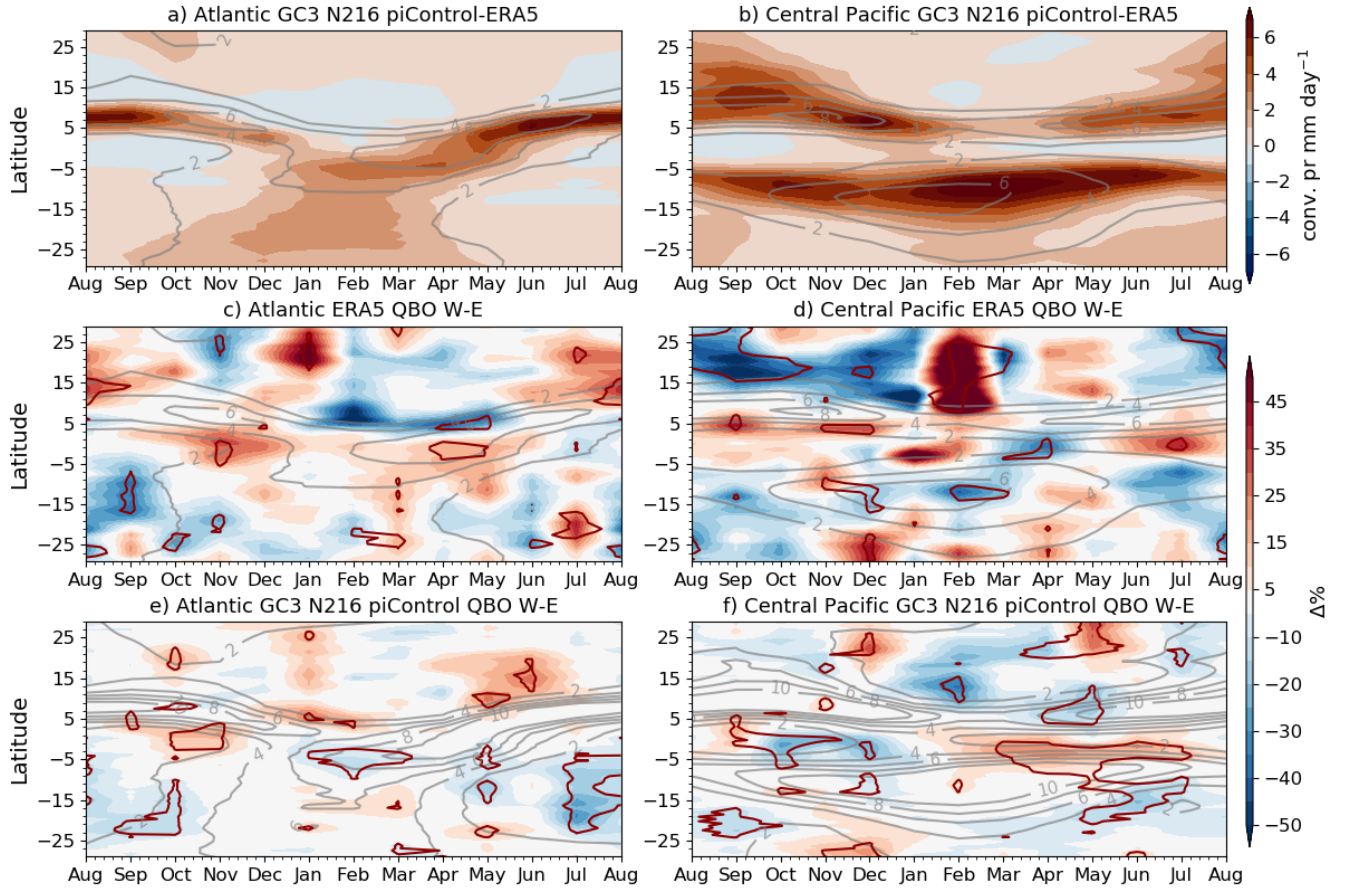

**Figure S5.** As in Figure 9 of the main manuscript but only for Neutral years only.
